# Supplementary material
Source: publisher figshare collection journal article supplement (https://sage.figshare.com/ndownloader/files/13380632)
Supplement: Supplementary file 1 [file 13380632]

Appendix B

Intervention Fidelity Checklist - Latency to Task Engagement

Setting & Staff Information:

|                       |                              |
|-----------------------|------------------------------|
| Observer Name:        | Date of Observation:         |
| Class Period:         | Subject Area:                |
| Classroom Teacher:    | Teacher:                     |
| Staff Being Observed: | # of students participating: |

\*Intervention Procedures:

- Student lists all assigned transitions in the correct order\*
- Student lists materials required for each transition and associated task\*
- Student sets a goal for each assigned transition\*
- Student views timing data from most recent observation\*
- Total time for intervention procedure is less than 2 minutes

Prompting and Intervention Compliance

Student completes

- Student participation in intervention requires prompting
- 0 Students     1 Student     2 Students     3 or more students

Types of Prompts Delivered

- Visual Prompt    \_\_\_\_\_ number of prompts delivered
- Verbal Prompt    \_\_\_\_\_ number of prompts delivered

\* Denotes elements required to ensure fidelity of implementation
